# Supplementary material for: Emergence of Vancomycin-Resistant Enterococcus faecium at an Australian Hospital: A Whole Genome Sequencing Analysis
Source: PubMed Central journal article supplement (PMC5908837; doi:10.1038/s41598-018-24614-6), 2018-04-19
Supplement: 41598_2018_24614_MOESM1_ESM.pdf [file 41598_2018_24614_MOESM1_ESM.pdf]

# **Emergence of Vancomycin-Resistant *Enterococcus faecium* at an Australian Hospital: A Whole Genome Sequencing Analysis**

Kelvin W.C. Leong<sup>1</sup>, Louise A. Cooley<sup>1,2</sup>, Tara L. Anderson<sup>2,3</sup>, Sanjay S. Gautam<sup>1</sup>, Belinda McEwan<sup>2</sup>, Anne Wells<sup>3</sup>, Fiona Wilson<sup>3</sup>, Lucy Hughson<sup>3</sup>, and Ronan F. O'Toole<sup>1,4,\*</sup>

<sup>1</sup>School of Medicine, University of Tasmania, Hobart, Tasmania, Australia

<sup>2</sup>Royal Hobart Hospital, Hobart, Tasmania, Australia

<sup>3</sup>Tasmanian Infection Prevention and Control Unit, Department of Health and Human Services, Hobart, Tasmania, Australia

<sup>4</sup>Trinity College Dublin, Department of Clinical Microbiology, Dublin, Ireland

\*ronan.otoole@utas.edu.au

**Supplementary Table S1.** Sequence statistics and de-identified epidemiological information of the whole-genome sequenced vancomycin-resistant *Enterococcus faecium* (VREfm) isolates ( $n=80$ ).

| Isolate Name | MLST   | Sample Type                   | Date of Admission | Date of Collection | Vancomycin Resistance Locus | % Coverage | No. of Aligned Bases | Mean Read Depth |
|--------------|--------|-------------------------------|-------------------|--------------------|-----------------------------|------------|----------------------|-----------------|
| 14C_RHH001   | ST796  | Clinical - other sterile site | 30/12/2013        | 14/01/2014         | B                           | 89.46      | 2413816              | 91.2            |
| 14C_RHH002   | ST796  | Clinical - urine              | 23/03/2014        | 26/03/2014         | B                           | 89.42      | 2412682              | 81.5            |
| 14S_RHH001   | ST555  | Screening                     | 10/01/2014        | 11/01/2014         | A                           | 89.12      | 2404519              | 65              |
| 14S_RHH002   | ST796  | Screening                     | 10/02/2014        | 31/03/2014         | B                           | 88.44      | 2386120              | 83.1            |
| 14S_RHH004   | ST80   | Screening                     | 12/04/2014        | 15/04/2014         | A                           | 89.50      | 2414873              | 71.8            |
| 14S_RHH008   | ST1421 | Screening                     | 30/09/2014        | 1/10/2014          | A                           | 89.05      | 2402743              | 80              |
| 15C_RHH001   | ST796  | Clinical - blood culture      | 29/06/2015        | 30/06/2015         | B                           | 89.35      | 2410856              | 79.2            |
| 15C_RHH002   | ST796  | Clinical - tissue             | 15/03/2015        | 5/10/2015          | B                           | 89.26      | 2408227              | 73.4            |
| 15C_RHH003   | ST796  | Clinical - urine              | 12/07/2015        | 1/08/2015          | B                           | 89.32      | 2410014              | 77.8            |
| 15C_RHH004   | ST78   | Clinical - urine              | 6/09/2015         | 17/09/2015         | B                           | 88.06      | 2375897              | 77.6            |
| 15C_RHH005   | ST796  | Clinical - urine              | 21/09/2015        | 22/09/2015         | B                           | 89.48      | 2414188              | 83.5            |
| 15C_RHH006   | ST796  | Clinical - urine              | 26/10/2015        | 10/11/2015         | B                           | 89.44      | 2413213              | 79.8            |
| 15C_RHH007   | ST796  | Clinical - urine              | 25/11/2015        | 2/12/2015          | B                           | 89.47      | 2413915              | 86.2            |
| 15S_RHH001   | ST80   | Screening                     | 2/03/2015         | 3/03/2015          | A                           | 89.14      | 2405144              | 69.2            |
| 15S_RHH004   | ST203  | Screening                     | 26/03/2015        | 27/03/2015         | A                           | 88.61      | 2390846              | 86.0            |
| 15S_RHH020   | ST203  | Screening                     | 15/09/2015        | 18/09/2015         | A                           | 88.84      | 2397152              | 95.5            |
| 15S_RHH044   | ST796  | Screening                     | 26/10/2015        | 30/10/2015         | B                           | 89.17      | 2406063              | 115.2           |
| 15S_RHH047   | ST796  | Screening                     | 6/11/2015         | 18/11/2015         | B                           | 88.70      | 2393371              | 77.2            |
| 15S_RHH048   | ST796  | Screening                     | 16/11/2015        | 15/12/2015         | B                           | 88.84      | 2397159              | 84.8            |
| 15S_RHH049   | ST796  | Screening                     | 1/12/2015         | 16/12/2015         | B                           | 89.23      | 2407448              | 120.9           |
| 16C_RHH001   | ST192  | Clinical - tissue             | 2/02/2016         | 19/02/2016         | B                           | 90.93      | 2453291              | 76.8            |
| 16C_RHH002   | ST796  | Clinical - urine              | 22/02/2016        | 23/02/2016         | B                           | 89.24      | 2407799              | 85.8            |
| 16C_RHH003   | ST796  | Clinical - urine              | 27/03/2016        | 28/03/2016         | B                           | 89.49      | 2414509              | 87              |
| 16C_RHH004   | ST796  | Clinical - urine              | 26/04/2016        | 30/04/2016         | B                           | 89.36      | 2411088              | 92.4            |
| 16C_RHH005   | ST796  | Clinical - wound site         | 4/06/2016         | 26/06/2016         | B                           | 89.43      | 2412909              | 85.5            |
| 16S_RHH001   | ST80   | Screening                     | 1/03/2016         | 19/03/2016         | A                           | 90.83      | 2450848              | 69.5            |
| 16S_RHH003   | ST80   | Screening                     | 21/02/2016        | 6/03/2016          | A                           | 85.09      | 2295945              | 33.2            |
| 16S_RHH004   | ST80   | Screening                     | 18/03/2016        | 27/03/2016         | A                           | 89.85      | 2424361              | 55              |
| 16S_RHH006   | ST796  | Screening                     | 28/12/2015        | 31/12/2015         | B                           | 88.76      | 2394892              | 35.7            |
| 16S_RHH007   | ST203  | Screening                     | 17/08/2016        | 19/02/2016         | A                           | 90.08      | 2430361              | 57.8            |
| 16S_RHH008   | ST796  | Screening                     | 15/02/2016        | 17/03/2016         | B                           | 89.34      | 2410382              | 273.6           |
| 16S_RHH009   | ST796  | Screening                     | 23/12/2015        | 7/01/2016          | B                           | 87.41      | 2358333              | 62.7            |
| 16S_RHH011   | ST80   | Screening                     | 4/03/2016         | 14/03/2016         | A                           | 90.20      | 2433836              | 57.8            |
| 16S_RHH013   | ST80   | Screening                     | 1/03/2016         | 9/03/2016          | A                           | 90.98      | 2454685              | 197.4           |
| 16S_RHH014   | ST80   | Screening                     | 20/02/2016        | 24/02/2016         | A                           | 91.01      | 2455486              | 47.7            |
| 16S_RHH015   | ST80   | Screening                     | 29/07/2016        | 8/08/2016          | A                           | 90.42      | 2439577              | 105.1           |
| 16S_RHH016   | ST80   | Screening                     | 22/02/2016        | 20/03/2016         | A                           | 91.10      | 2457884              | 123.6           |
| 16S_RHH017   | ST1421 | Screening                     | 24/05/2016        | 25/05/2016         | A                           | 91.45      | 2467385              | 63              |

|            |        |           |            |            |     |       |         |       |
|------------|--------|-----------|------------|------------|-----|-------|---------|-------|
| 16S_RHH018 | ST80   | Screening | 27/05/2016 | 28/05/2016 | A   | 88.57 | 2389615 | 110.9 |
| 16S_RHH019 | ST1421 | Screening | 16/06/2016 | 16/06/2016 | A   | 91.84 | 2477881 | 45.7  |
| 16S_RHH020 | ST1421 | Screening | 6/07/2016  | 8/07/2016  | A   | 91.76 | 2475899 | 57.3  |
| 16S_RHH021 | ST1421 | Screening | 26/01/2016 | 8/02/2016  | A   | 91.93 | 2480406 | 48    |
| 16S_RHH022 | ST1421 | Screening | 4/08/2016  | 4/08/2016  | A   | 89.19 | 2406352 | 66.6  |
| 16S_RHH023 | ST796  | Screening | 5/02/2016  | 6/02/2016  | B   | 88.78 | 2395298 | 53.4  |
| 16S_RHH024 | ST796  | Screening | 12/01/2016 | 3/02/2016  | B   | 89.45 | 2413453 | 54.8  |
| 16S_RHH025 | ST796  | Screening | 15/01/2016 | 5/02/2016  | B   | 89.35 | 2410744 | 73.5  |
| 16S_RHH026 | ST796  | Screening | 5/02/2016  | 15/02/2016 | B   | 89.34 | 2410480 | 83    |
| 16S_RHH027 | ST796  | Screening | 15/02/2016 | 16/02/2016 | B   | 89.19 | 2406430 | 72.2  |
| 16S_RHH028 | ST80   | Screening | 4/03/2016  | 27/03/2016 | A/B | 89.27 | 2408495 | 86.2  |
| 16S_RHH029 | ST796  | Screening | 17/02/2016 | 6/04/2016  | B   | 88.02 | 2374907 | 96.7  |
| 16S_RHH030 | ST80   | Screening | 31/03/2016 | 10/04/2016 | A   | 89.99 | 2428043 | 81.6  |
| 16S_RHH031 | ST80   | Screening | 4/03/2016  | 18/03/2016 | A   | 90.96 | 2454356 | 168   |
| 16S_RHH032 | ST796  | Screening | 12/04/2016 | 17/04/2016 | B   | 88.22 | 2380431 | 90.9  |
| 16S_RHH033 | ST796  | Screening | 3/02/2016  | 17/05/2016 | B   | 89.45 | 2413391 | 80.4  |
| 16S_RHH035 | ST796  | Screening | 24/05/2016 | 29/05/2016 | B   | 89.40 | 2412072 | 178.4 |
| 16S_RHH036 | ST796  | Screening | 1/04/2016  | 30/05/2016 | B   | 88.47 | 2386996 | 107.7 |
| 16S_RHH037 | ST796  | Screening | 28/05/2016 | 2/06/2016  | B   | 88.95 | 2399974 | 134.9 |
| 16S_RHH038 | ST796  | Screening | 17/05/2016 | 29/05/2016 | B   | 89.14 | 2405092 | 90.4  |
| 16S_RHH039 | ST796  | Screening | 29/05/2016 | 5/06/2016  | B   | 88.72 | 2393680 | 139.5 |
| 16S_RHH040 | ST796  | Screening | 20/05/2016 | 13/06/2016 | B   | 88.52 | 2388378 | 100.3 |
| 16S_RHH041 | ST796  | Screening | 19/05/2016 | 9/06/2016  | B   | 88.80 | 2395828 | 87.4  |
| 16S_RHH043 | ST80   | Screening | 28/06/2016 | 29/06/2016 | A   | 85.50 | 2306773 | 28.6  |
| 16S_RHH044 | ST1421 | Screening | 18/08/2016 | 19/08/2016 | A   | 89.65 | 2418956 | 52.8  |
| 16S_RHH046 | ST1421 | Screening | 6/09/2016  | 7/09/2016  | A   | 90.88 | 2451958 | 49.6  |
| 16S_RHH048 | ST796  | Screening | 29/08/2016 | 11/09/2016 | B   | 91.72 | 2474697 | 93.6  |
| 16S_RHH050 | ST796  | Screening | 14/09/2016 | 15/09/2016 | B   | 88.10 | 2377078 | 70.3  |
| 16S_RHH051 | ST1421 | Screening | 15/09/2016 | 16/09/2016 | A   | 88.70 | 2393154 | 52.4  |
| 16S_RHH052 | ST80   | Screening | 31/08/2016 | 18/09/2016 | A   | 84.16 | 2270800 | 44.5  |
| 16S_RHH053 | ST796  | Screening | 18/09/2016 | 2/10/2016  | B   | 88.47 | 2387020 | 74.2  |
| 16S_RHH054 | ST796  | Screening | 24/09/2016 | 5/10/2016  | B   | 88.65 | 2392023 | 92.3  |
| 16S_RHH055 | ST1421 | Screening | 6/10/2016  | 7/10/2016  | A   | 89.37 | 2411387 | 47.2  |
| 16S_RHH056 | ST796  | Screening | 30/09/2016 | 9/10/2016  | B   | 91.27 | 2462683 | 83.9  |
| 16S_RHH057 | ST796  | Screening | 12/10/2016 | 13/10/2016 | B   | 88.93 | 2399416 | 72.6  |
| 16S_RHH058 | ST796  | Screening | 22/10/2016 | 25/10/2016 | B   | 89.47 | 2413996 | 90.7  |
| 16S_RHH059 | ST796  | Screening | 24/10/2016 | 28/10/2016 | B   | 89.15 | 2405337 | 83.8  |
| 16S_RHH060 | ST1421 | Screening | 26/10/2016 | 27/10/2016 | A   | 89.16 | 2405748 | 46    |
| 16S_RHH061 | ST796  | Screening | 23/10/2016 | 30/10/2016 | B   | 88.18 | 2379102 | 116.2 |
| 16S_RHH062 | ST203  | Screening | 18/10/2016 | 30/10/2016 | A   | 89.04 | 2402435 | 85.8  |
| 16S_RHH064 | ST796  | Screening | 20/10/2016 | 3/11/2016  | B   | 88.92 | 2399293 | 83.7  |
| 16S_RHH065 | ST796  | Screening | 24/10/2016 | 3/11/2016  | B   | 88.87 | 2397728 | 71.0  |

---
